# Supplementary material
Source: Royal Society of Chemistry journal article supplement (doi:10.1039/d6ay00465b)
Supplement: d6ay00465b3.pdf [file d6ay00465b3.pdf]

# Supporting information

## Highly sensitive identification of illegal cooking oil by surface-enhanced Raman spectroscopy combined with acyl nucleophilic substitution reaction to detect capsaicin

Shengping Han, Guican Deng, YongHua Bao, Yanping Hong, Jiaxin Hong, Luying Duan, Huaying Du, Zhimei Tan, Chunrong Wang (corresponding author) (Email: [crwang2017@jxau.edu.cn](mailto:crwang2017@jxau.edu.cn))\*

Jiangxi Key Laboratory of Natural Product and Functional Food, School of Food Science and Engineering, Jiangxi Agricultural University, Nanchang 330045, China

### Contents

**Fig. S1.** Mass spectrum of the capsaicin derivatization product

**Fig. S2.** Raman spectra of the capsaicin derivative at different reaction times: (A)  $10^{-8}$  g/mL; (B)  $10^{-9}$  g/mL; (C)  $10^{-10}$  g/mL (capsaicin concentration).

**Fig.S3.** SERS spectrum of  $5.0 \times 10^{-12}$  g/mL capsaicin in soybean oil matrix.

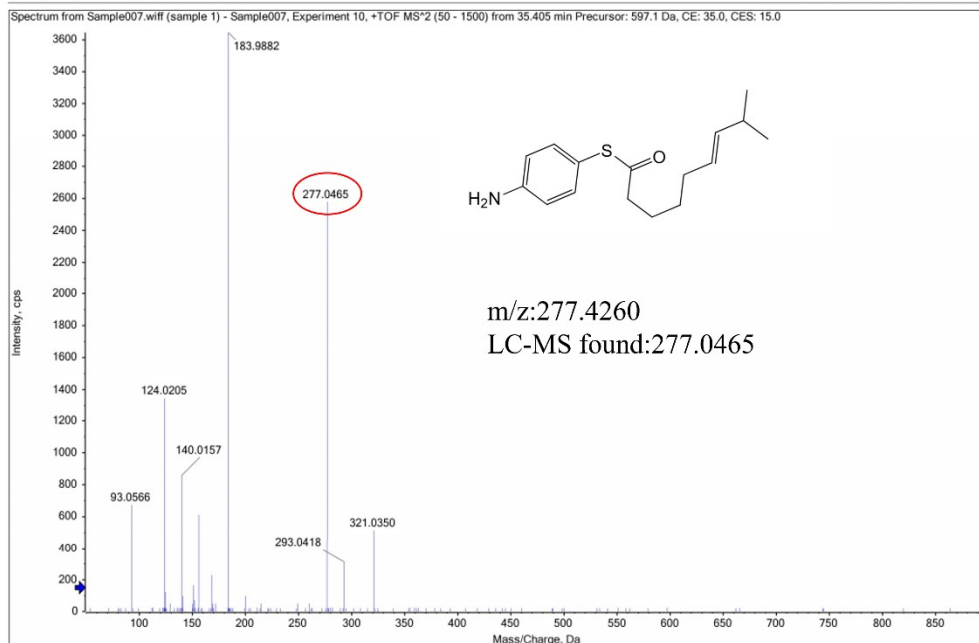

Fig. S1. Mass spectrum of the capsaicin derivatization product

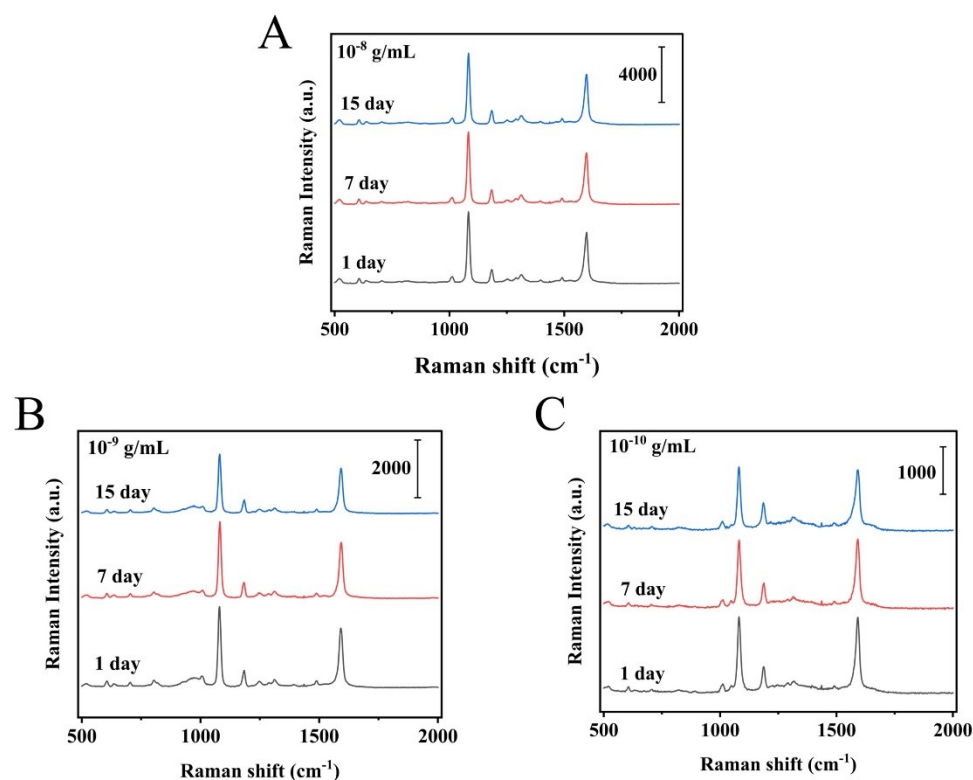

Fig. S2. Raman spectra of the capsaicin derivative at different reaction times: (A) 10<sup>-8</sup> g/mL; (B) 10<sup>-9</sup> g/mL; (C) 10<sup>-10</sup> g/mL (capsaicin concentration).

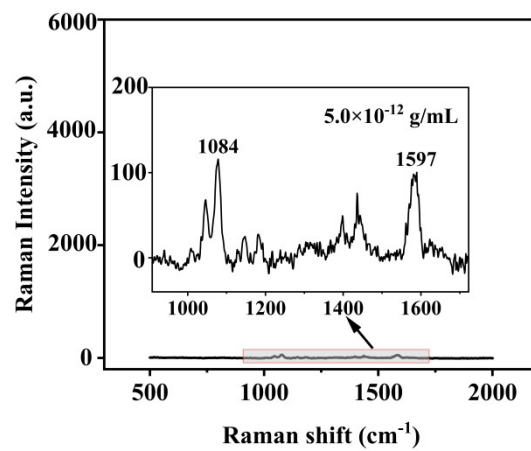

**Fig. S3.** SERS spectrum of  $5.0 \times 10^{-12}$  g/mL capsaicin in soybean oil matrix.
