# Supplementary material
Source: Royal Society of Chemistry journal article supplement (doi:10.1039/d6ay00465b)

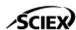

SCIEX OS version: 3.1.6.44  
Workstation ID: DESKTOP-05SJ7T6

Printed by: DESKTOP-05SJ7T6/lenovo  
Printed on: 4/8/2026 10:04:39 PM

Spectrum from Sample007.mif (sample 1) - Sample007, Experiment 10, \*TOF MS\*2 (50 - 1500) from 35.405 min Precursor: 597.1 Da, CE: 35.0, CES: 15.0

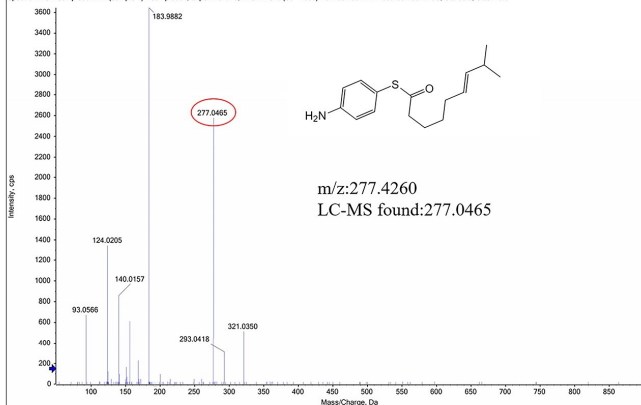

Supplement: d6ay00465b4.pdf [file d6ay00465b4.pdf]
