# Supplementary material
Source: Royal Society of Chemistry journal article supplement (doi:10.1039/d6ay00465b)

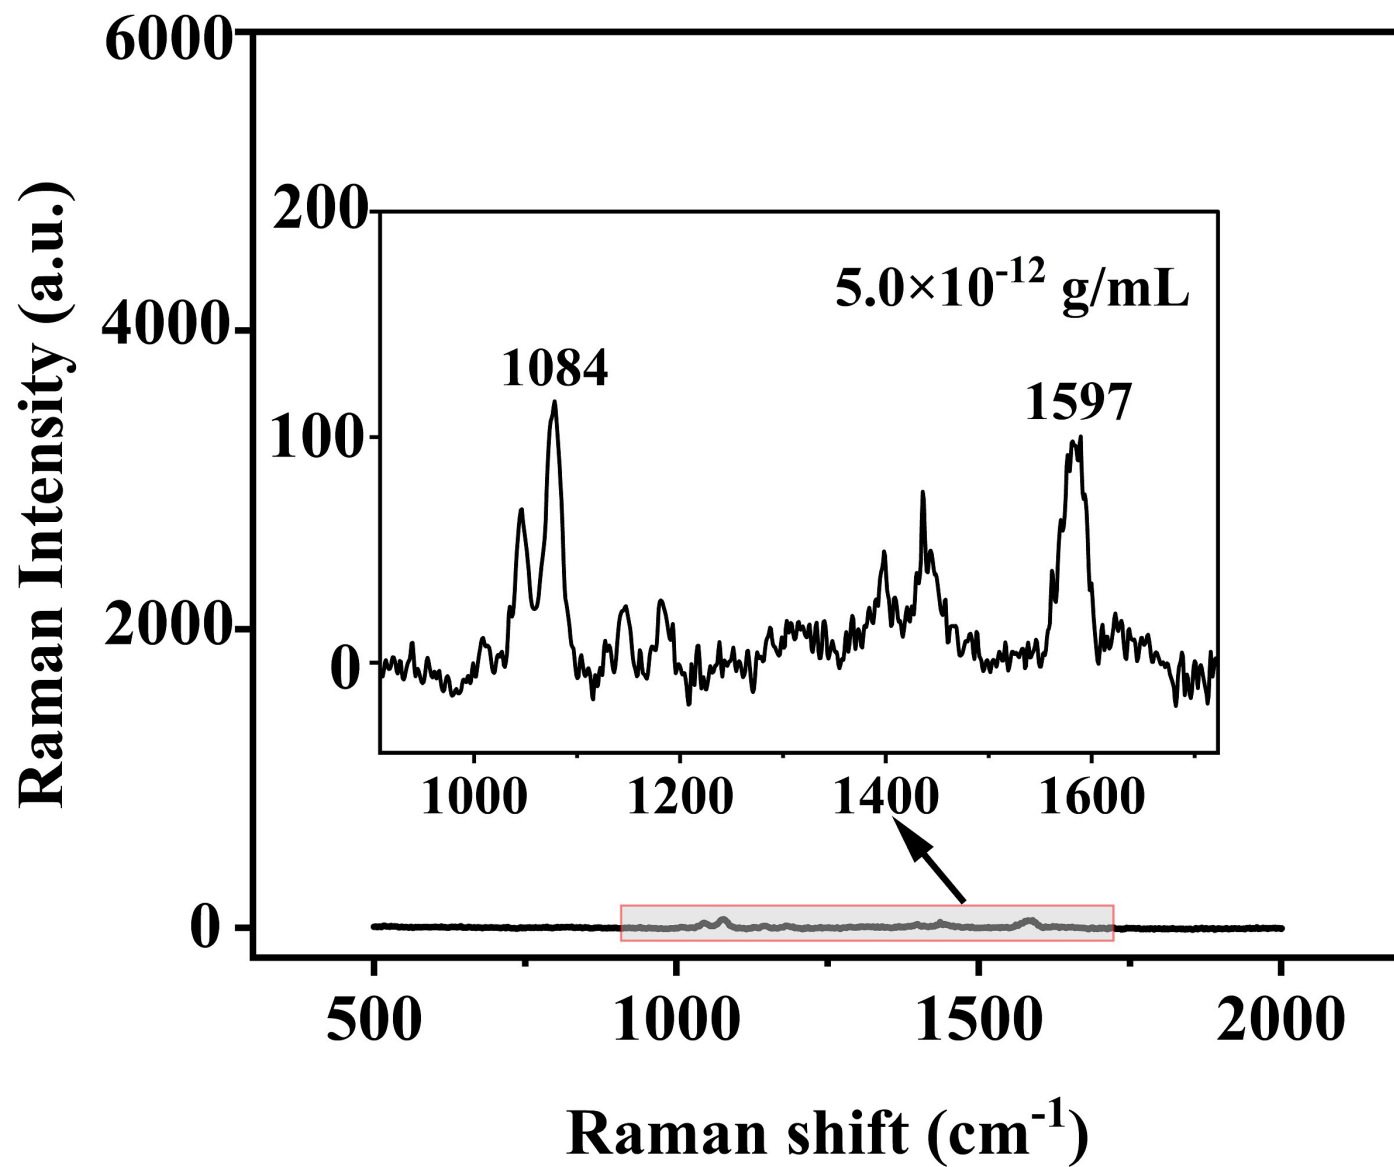

Supplement: d6ay00465b2.pdf [file d6ay00465b2.pdf]

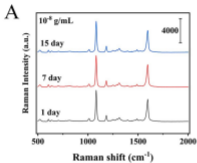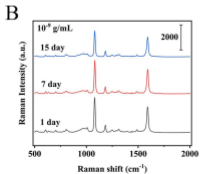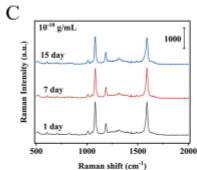

Supplement: d6ay00465b5.pdf [file d6ay00465b5.pdf]
